# Supplementary material
Source: publisher figshare collection journal article supplement (https://acs.figshare.com/ndownloader/files/4453036)
Supplement: Supplementary file 1 [file 4453036]

# A Sensitive Multispectroscopic Probe for Nucleic Acids

*J. Phys. Chem. B*

*Xin Sonia Gai, Edward E. Fenlon\* and Scott H. Brewer\**

## Supporting Information

### 1. Synthetic Schemes (Procedures are given in the paper.)

#### Internal and terminal labeled (1:1) trifluoromethanesulfonic azide (triflic azide).<sup>#</sup>

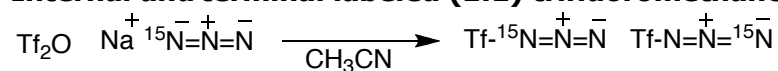

#### <sup>15</sup>N middle labeled and unlabeled (1:1) 2'-Azido-2'-deoxyuridine (1m and 1).<sup>1</sup>

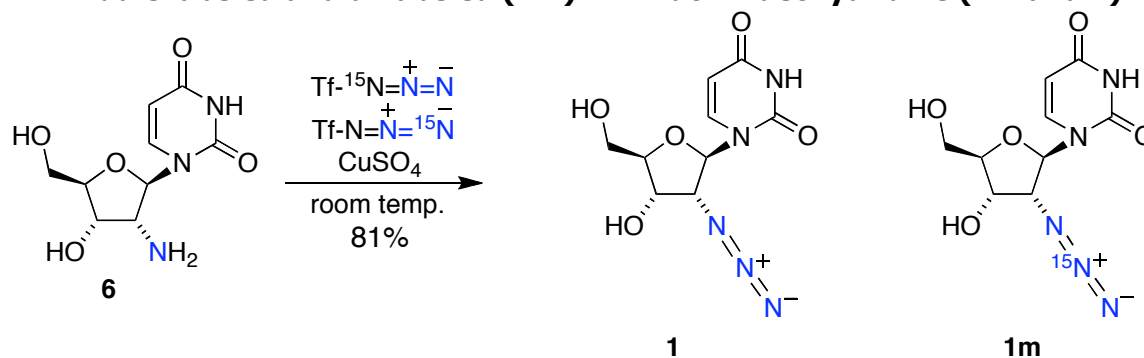

#### <sup>15</sup>N internal and terminal labeled (1:1) 3', 5'-Bis-O-(acetyl)-2'-Azido-2'-deoxyuridine (8i and 8t).<sup>3</sup>

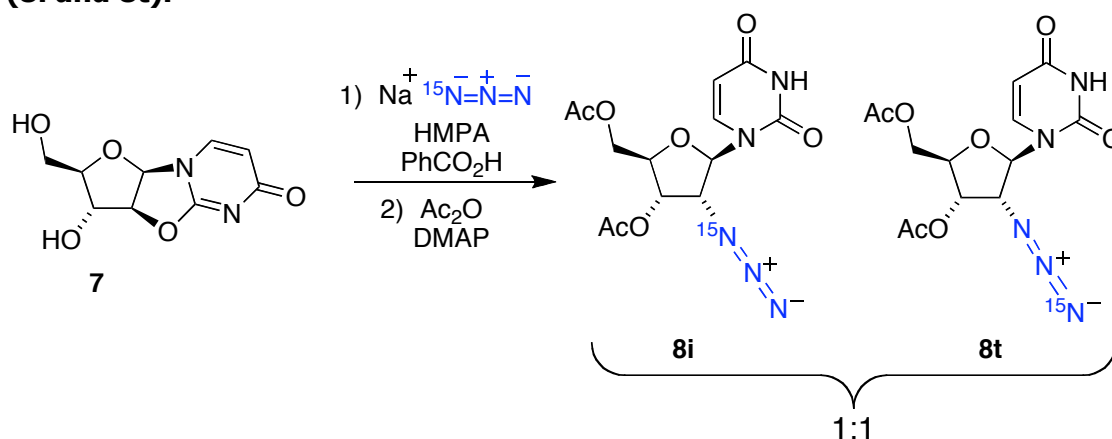

**<sup>15</sup>N internal and terminal labeled (1:1) 2'-Azido-2'-deoxyuridine (1i and 1t).**

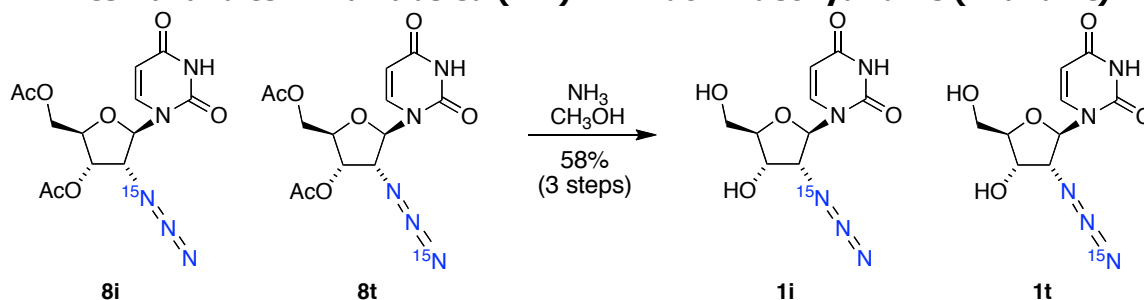

**3',5'-Bis-O-(tert-butyldiphenylsilyl)-2'-azido-2'-deoxyuridine (3).**

**<sup>15</sup>N middle labeled and unlabeled 3',5'-Bis-O-(tert-butyldiphenylsilyl)-2'-azido-2'-deoxyuridine (3m and 3).** (Same procedure as used to prepare 3.)

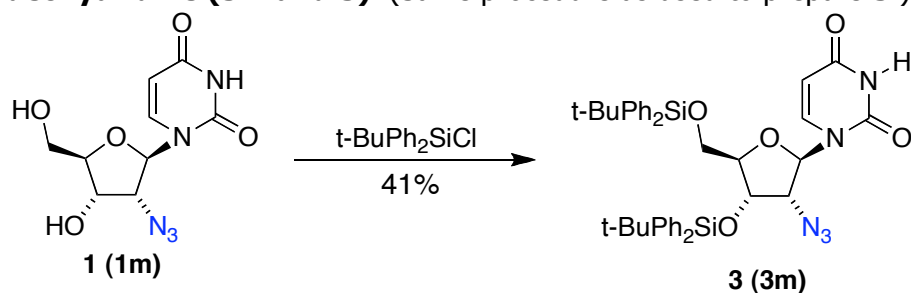

## 2. Experimental IR Data

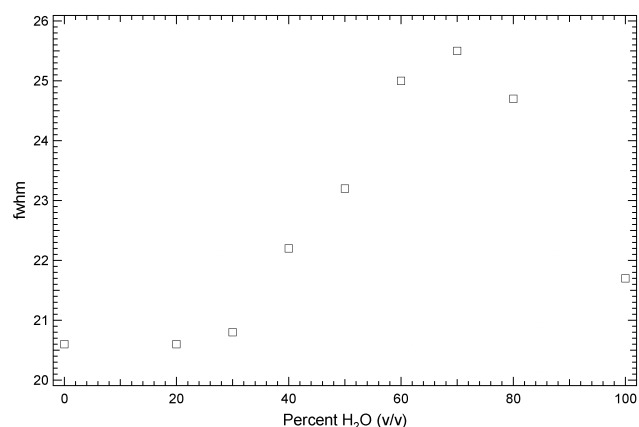

**Figure S1.** The dependence of the full-width half-maximum (fwhm) of the IR absorbance band of the azide stretch of **1** on the amount of water in the water-THF solvent mixtures (open squares).

### 3. DFT Calculations Figures and Table

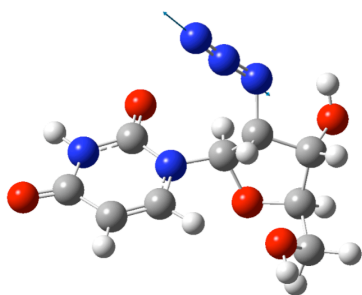

**Figure S2.** Eigenvector projection for the 2297.58  $\text{cm}^{-1}$  vibrational mode of **1** as a monomer comprised primarily of an  $\text{N}_3$  asymmetric stretch.

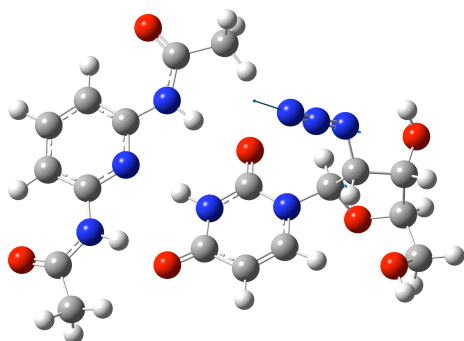

**Figure S3.** DFT calculation model for the 2297.23  $\text{cm}^{-1}$  vibrational mode of **1** forming a dimer with compound **4** comprised primarily of an  $\text{N}_3$  asymmetric stretch.

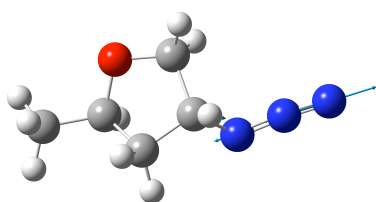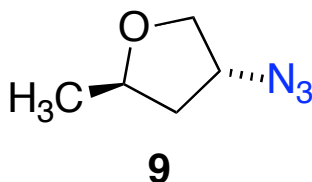

**Figure S4.** DFT calculation model for the 2274.9  $\text{cm}^{-1}$  vibrational mode of (*2R*, *4R*) 2-methyl-4-azidotetrahydrofuran (**9**) comprised primarily of an  $\text{N}_3$  asymmetric stretch.

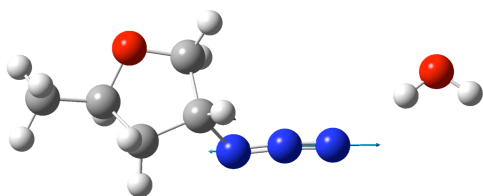

**Figure S5.** DFT calculation model for the 2283.39 cm<sup>-1</sup> vibrational mode of (2*R*, 4*R*) 2-methyl-4-azidotetrahydrofuran (**9**) with one explicit water molecule comprised primarily of an N<sub>3</sub> asymmetric stretch.

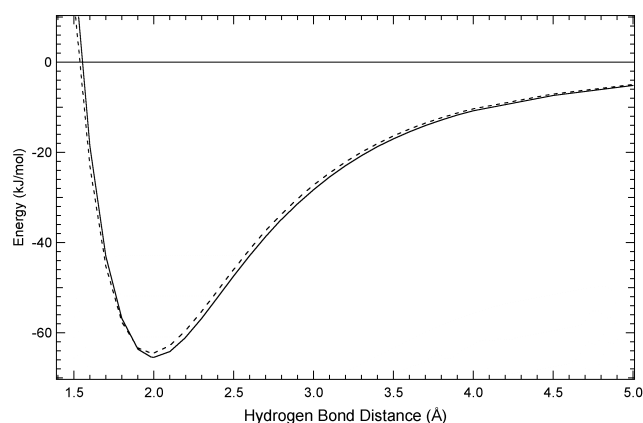

**Figure S6.** Potential energy surface (PES) corresponding to the energy of interaction between **N<sub>3</sub>-dU (1)** and **5** (dashed line) and 2'-deoxyuridine and **5** (solid line) formed by modulating the distance between the imino N-H group of **N<sub>3</sub>-dU** /2'-deoxyuridine and the pyridine nitrogen of **5** allowing all other coordinates to be optimized. The energy at a hydrogen bond distance of 10 Å was subtracted from all other calculated energies to determine the energy of interaction between the molecules.

**Table S1.** DFT calculation results of the change in <sup>15</sup>N NMR chemical shift of triply-labeled **N<sub>3</sub>-dU** upon heterodimer formation with **4**

|                | Terminal N atom (ppm) | Middle N atom (ppm) | Internal N atom (ppm) |
|----------------|-----------------------|---------------------|-----------------------|
| $\Delta\delta$ | 0.292                 | 0.469               | 0.3923                |

#### 4. Experimental Isotopic Shifts of **1m/1** and **1t/1i**

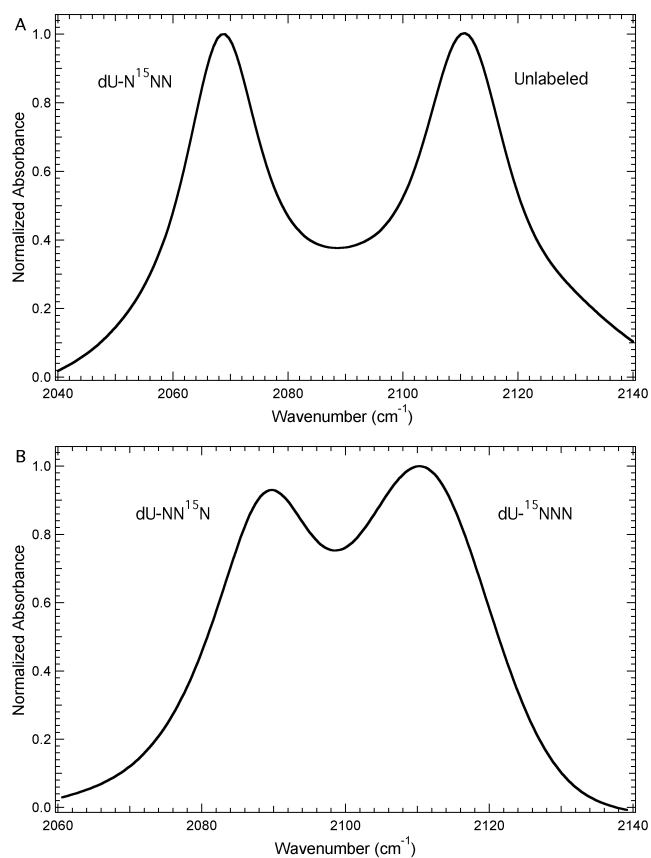

**Figure S7.** FTIR absorbance spectra of (A) **1m** and **1**, and (B) **1t** and **1i** in THF recorded at 293 K. The spectra were normalized to a maximum absorbance of unity. The concentrations were 50 mM.
